# Supplementary material
Source: PubMed Central journal article supplement (PMC5553575)
Supplement: blood767293-suppl1.pdf [file blood767293-suppl1.pdf]

# **Bifurcated BACH2 control coordinates mantle cell lymphoma survival and dispersal during hypoxia**

Han Zhang, Zheng Chen, Roberto N. Miranda, L. Jeffrey Medeiros and Nami McCarty

## **Supplemental Methods**

### **Cell lines and plasmids**

Human MCL cell line Jeko was obtained from the ATCC (Manassas, VA). Human MCL SP53 cell line was a kind gift from MD Anderson Cancer Center (MDACC). HS5 bone marrow stromal cells (BMSCs) were a kind gift from Dr. B. Torok-Storb (Fred Hutchinson Cancer Research Center, Seattle, WA). Cell lines were authenticated using short tandem repeats in Characterized Cell Line Core Facility at MDACC within 6 months. HA-HIF-1 $\alpha$ -pcDNA3 expression plasmids were gifts from William Kaelin (Addgene plasmid # 18949)<sup>1</sup>. pEGFP-BACH2 plasmid was constructed by sub-cloning BACH2 coding sequence from human pLOC-BACH2 plasmid (GE Dharmacon; Clone ID: PLOHS\_100066339) and inserting into pEGFP-N1 vector at XhoI and BamHI sites. The construction of pEGFP-BACH2 plasmid was further verified by sequencing.

### **Cell culture and MCL sample preparation**

Cells were maintained under standard conditions (5% CO<sub>2</sub>, 37°C) and cultured in complete RPMI1640 medium (Cellgro, Manassas, VA) supplemented with 10% fetal bovine serum (FBS), 2mM L-glutamine, and 100 U.I. /mL penicillin/streptomycin. Mononuclear cells from MCL patients were isolated from apheresis blood, bone marrow (BM) or spleen (SP) using standard Ficoll (GE Healthcare, Pittsburgh, PA) gradient separation methods. CD19<sup>+</sup> B cells were isolated as previously described<sup>2</sup>.

## Chemicals and Antibodies

Bortezomib was acquired from MDACC drug repository. Cycloheximide (CHX),  $\text{CoCl}_2$  and MG132 were purchased from Sigma-Aldrich (St. Louis, MO). KC7F2 was purchased from Selleck Chemicals (Houston, TX). Fixable viability dye eFluor™ 780 was purchased from Thermo Fisher Scientific (Waltham, MA). Anti-human-CD45-APC, anti-human-CD19-FITC, anti-human-CD19-APC and anti-human-Ki-67-FITC were purchased from BD Biosciences (San Jose, CA) for FACS analysis. The following antibodies were used for immunoblots: anti-BACH2 (AbCam, Cambridge, MA), anti-IRF4 (eBioscience, San Diego, CA), anti-HIF-1 $\alpha$  and anti-PHD3/EGLN3 (Novus Biologicals, Littleton, CO), anti-HO-1 and anti-GAPDH (Cell Signaling, Danvers, MA).

## Generation of single guide RNA (sgRNA) expression vectors

To establish a lentiviral CRISPR-Cas9-mediated knockout system, the MIT CRISPR design software was used for the design of sgRNAs (<http://crispr.mit.edu>). sgRNA sequences with a minimal number of off-target sites in the human genome were selected. 25-bp oligonucleotides containing the sgRNA sequences were synthesized (Sigma-Aldrich, St. Louis, MO), and constructed into the LentiCRISPR vector. sgRNA sequences are as follows: *BACH2*, 5'-TCGCACAGCGCTAACGTGAG-3'; *HIF-1 $\alpha$* , 5'-GATCTCGGCGAAGTAAAGAA-3'; *PHD3*, 5'-CGATTCTGCGGGCGAGATGC-3'. The sgRNA expression vectors were generated and verified as previously described<sup>3</sup>

## Generation of lentivirus constructs and infection

To generate BACH2 knockout (BACH2<sup>KO</sup>), HIF-1 $\alpha$  knockout (HIF-1 $\alpha$ <sup>KO</sup>) or PHD3 knockout (PHD3<sup>KO</sup>) lentiviruses, 293FT cells were transfected with LentiCRISPR plasmids specific for BACH2, HIF-1 $\alpha$  or PHD3; a lentivirus empty vector LentiCRISPRv2 was used as a negative

control. To generate BACH2 overexpressed lentivirus, 293FT cells were transfected with human BACH2 (GE Dharmacon; Clone ID: PLOHS\_100066339). Lentiviruses were produced as previously described<sup>4</sup>. Lentiviral-transduced cells were selected with puromycin (2 µg/mL) or blasticidin (5 µg/mL) for 10 days. Dead cells were removed by standard Ficoll gradient separation methods during antibiotics selection. Stable cells were generated and confirmed by immunoblot analysis.

### **Cell viability assay**

To determine cell growth, viable cells were counted using Trypan Blue Solution (Corning, Manassas, VA). Cytotoxicity was assessed with Fluorimetric cell viability assay using CellTiter-Blue® (Promega, Madison, WI), as previously described<sup>2</sup>.

### **Cell division and cell survival assays**

BACH2<sup>KO</sup> or control MCL cells were allowed to cycle for 6 days. During this time-course, cells were stained with PKH26 dye, and its intensity was tracked using a LSR-II flow cytometer (BD Biosciences, San Jose, CA). The FACS data were further analyzed using a FlowJo software. Meanwhile, cell survival was monitored by staining cells with Annexin V/7-AAD using a PE Annexin V Apoptosis Detection kit (BD Biosciences, San Jose, CA) according to the manufacturer's protocol.

### **Cell cycle analysis**

MCL cells were stained with propidium iodide (PI). After staining, cells were promptly run through a LSR-II flow cytometer to determine the cell cycle distribution. The FACS data were further analyzed using a FlowJo software.

### **Quantitative real-time PCR (qRT-PCR) and primers**

Procedures for mRNA analysis by qRT-PCR were performed as previously described<sup>2</sup>. The relative expression level of each gene was normalized to the *GAPDH* by the method of  $2^{-\Delta\Delta Ct}$ . The involved genes and primers are shown as follows: *PRDM1* 5'-GCCAAGTTCACCCAGTTTGT-3', 5'-GATTCGGGTCAGATCTTCCA-3'; *IRF4* 5'-GCCAGAGCAGGATCTACTGG-3', 5'-GGGTCTGGAACTCCTCTCC-3'; *BACH2* 5'-ACACGAGGACTGCGAGAACT-3', 5'-GGGCTTCTTCCTTCTCTGCT-3'; *PHD3* 5'-TCAGATCGTAGGAACCCACA-3', 5'-CTTCAGTGAGGGCAGATTCA-3'; *S100A2* 5'-GGGAGAAAGTGGATGAGGAG-3', 5'-ACAGTGATGAGTGCCAGGAA-3'; *HMOX1* 5'-GAGACTCCCAGAGGGAAGC-3', 5'-TCACATGGCATAAAGCCCTA-3'; *PHD2* 5'-GCCCAGTTTGCTGACATTGAAC-3', 5'-CCCTCACACCTTTTTTTCACCTGTTAG-3'. Primers for cell cycle related genes, *IL-6*, *IL-6R*, *IL-6ST* and *GAPDH* were provided as described before<sup>3</sup>.

### **MethoCult colony assay**

MCL cells ( $5 \times 10^3$ ) were suspended in 1 mL of complete MethoCult medium and plated onto 35mm petri dishes. Colonies were cultured, counted and photographed as previously described<sup>3</sup>.

### **Tumor xenografts**

Manipulated SP53 MCL cells were injected into NOD/SCID mice via subcutaneous injection (s.c.,  $3.5 \times 10^6$ /mouse) or intravenous injection (i.v.,  $3 \times 10^6$ /mouse). Mice were sacrificed 4 weeks (s.c.) or 8 weeks (i.v.) post-injection; the subcutaneous tumors, spleen and bone marrow were isolated for further analysis. The tumor volumes were measured as previously described<sup>4</sup>. The % population of human leukocyte cells from i.v. xenograft organs was determined by Anti-human-CD45-APC antibodies based on live cells stained with DAPI. The FACS data were analyzed using a FlowJo software. CD45<sup>+</sup> human cells from xenograft organs via s.c. injection were isolated by magnetic bead-activated cell sorting (MACS) using human CD45-MicroBeads

following the manufacturer's instructions (Miltenyi Biotec, Bergisch Gladbach, Germany). The characteristics of xenograft mice are described in detail in **supplemental Table 2**.

### **Cell adhesion assay**

Cell adhesion assay was performed as previously described<sup>2</sup>. PKH26 dye intensity was measured using an Infinite®M1000 (TECAN, Morrisville NC) fluorescent plate reader.

Representative pictures were taken using the Olympus DP71 digital camera on an Olympus IX70 microscope.

### **Ki-67 expression analysis**

Primary cells from MCL patients were pre-stained with anti-human-CD19-APC antibodies and fixable viability dye eFluor™ 780 for 20 min on ice followed by fixation using a Fixation/Permeabilization Solution kit (BD Biosciences, San Jose, CA) according to the manufacturer's protocol. The fixed cells were then stained with anti-human-Ki-67-FITC antibodies for 20 min on ice before running through a LSR-II flow cytometer. CD19<sup>+</sup> B cells were gated based on live cells stained with fixable viability dye. Ki-67 levels were then determined within CD19<sup>+</sup> B cells. The FACS data were further analyzed using a FlowJo software.

### **Immunoblotting and semi-quantitative analysis**

Total harvested cells were lysed to perform immunoblotting assay as previously described<sup>2</sup>. Immunoblotting was subjected to semi-quantitative analysis using an ImageJ software. The relative expression levels of proteins were normalized to GAPDH.

### **Generation of truncated promoter constructs**

Four truncated human *BACH2* promoters containing different numbers of putative HREs sites (referred to as HRE1 [-510 to -215], HRE2 [-980 to -215], HRE3 [-1051 to -215] and HRE4 [-

1051 to +424], respectively) were amplified by PCR from genomic DNA. These PCR products were inserted into pGL2-basic vector (Promega, Madison, WI) at MluI and XhoI sites to make constructs of pGL2-HRE1, pGL2-HRE2, pGL2-HRE3 and pGL2-HRE4, respectively. These truncated promoter constructs were further verified by sequencing.

### **Luciferase activity assay**

293T cells ( $3 \times 10^4$ ) were cultured in a 96-well plate overnight and transfected with firefly luciferase vectors using the calcium phosphate transfection method. The *Renilla* luciferase reporter pRL-SV40 was co-transfected as an internal control for normalization. The pGL2-basic empty vector was used as a negative control. During 48 h transfection, cells were either treated with  $\text{CoCl}_2$  at 24 h prior to harvest or cultured at 1%  $\text{O}_2$  for 4 h with or without KC7F2 treatment prior to harvest. Cells cultured under normal conditions or without chemical treatment were used as controls.

### **Chromatin immunoprecipitation (ChIP)**

SP53 MCL cells were cultured at 1%  $\text{O}_2$  for 4 hours or in normal conditions. Chromatin was immunoprecipitated with antibodies against HIF-1 $\alpha$  or control IgG. Total chromatin before immunoprecipitation (input) was used as a positive control for PCR. The primers used for PCR amplification of immunoprecipitated chromatin fragments are listed in **supplemental Table 3**.

### **Statistical analysis**

Data reported are described as experimental mean  $\pm$  standard deviations. Statistical significance of differences between control and experimental groups was evaluated by the Student t-test, where \* $p < 0.05$  and \*\* $p < 0.01$  are considered statistically significant. All experiments and assays were repeated at least twice and performed in duplicate or triplicate.

## References

1. Kondo K, Klco J, Nakamura E, Lechpammer M, Kaelin WG, Jr. Inhibition of HIF is necessary for tumor suppression by the von Hippel-Lindau protein. *Cancer Cell*. 2002;1(3):237-246.
2. Zhang H, Chen Z, Neelapu SS, Romaguera J, McCarty N. Hedgehog inhibitors selectively target cell migration and adhesion of mantle cell lymphoma in bone marrow microenvironment. *Oncotarget*. 2016;7(12):14350-14365.
3. Zhang H, Chen Z, Miranda RN, Medeiros LJ, McCarty N. TG2 and NF-kappaB Signaling Coordinates the Survival of Mantle Cell Lymphoma Cells via IL6-Mediated Autophagy. *Cancer Res*. 2016;76(21):6410-6423.
4. Teo AE, Chen Z, Miranda RN, McDonnell T, Medeiros LJ, McCarty N. Differential PAX5 levels promote malignant B-cell infiltration, progression and drug resistance, and predict a poor prognosis in MCL patients independent of CCND1. *Leukemia*. 2016;30(3):580-593.

## Supplemental Figure 1

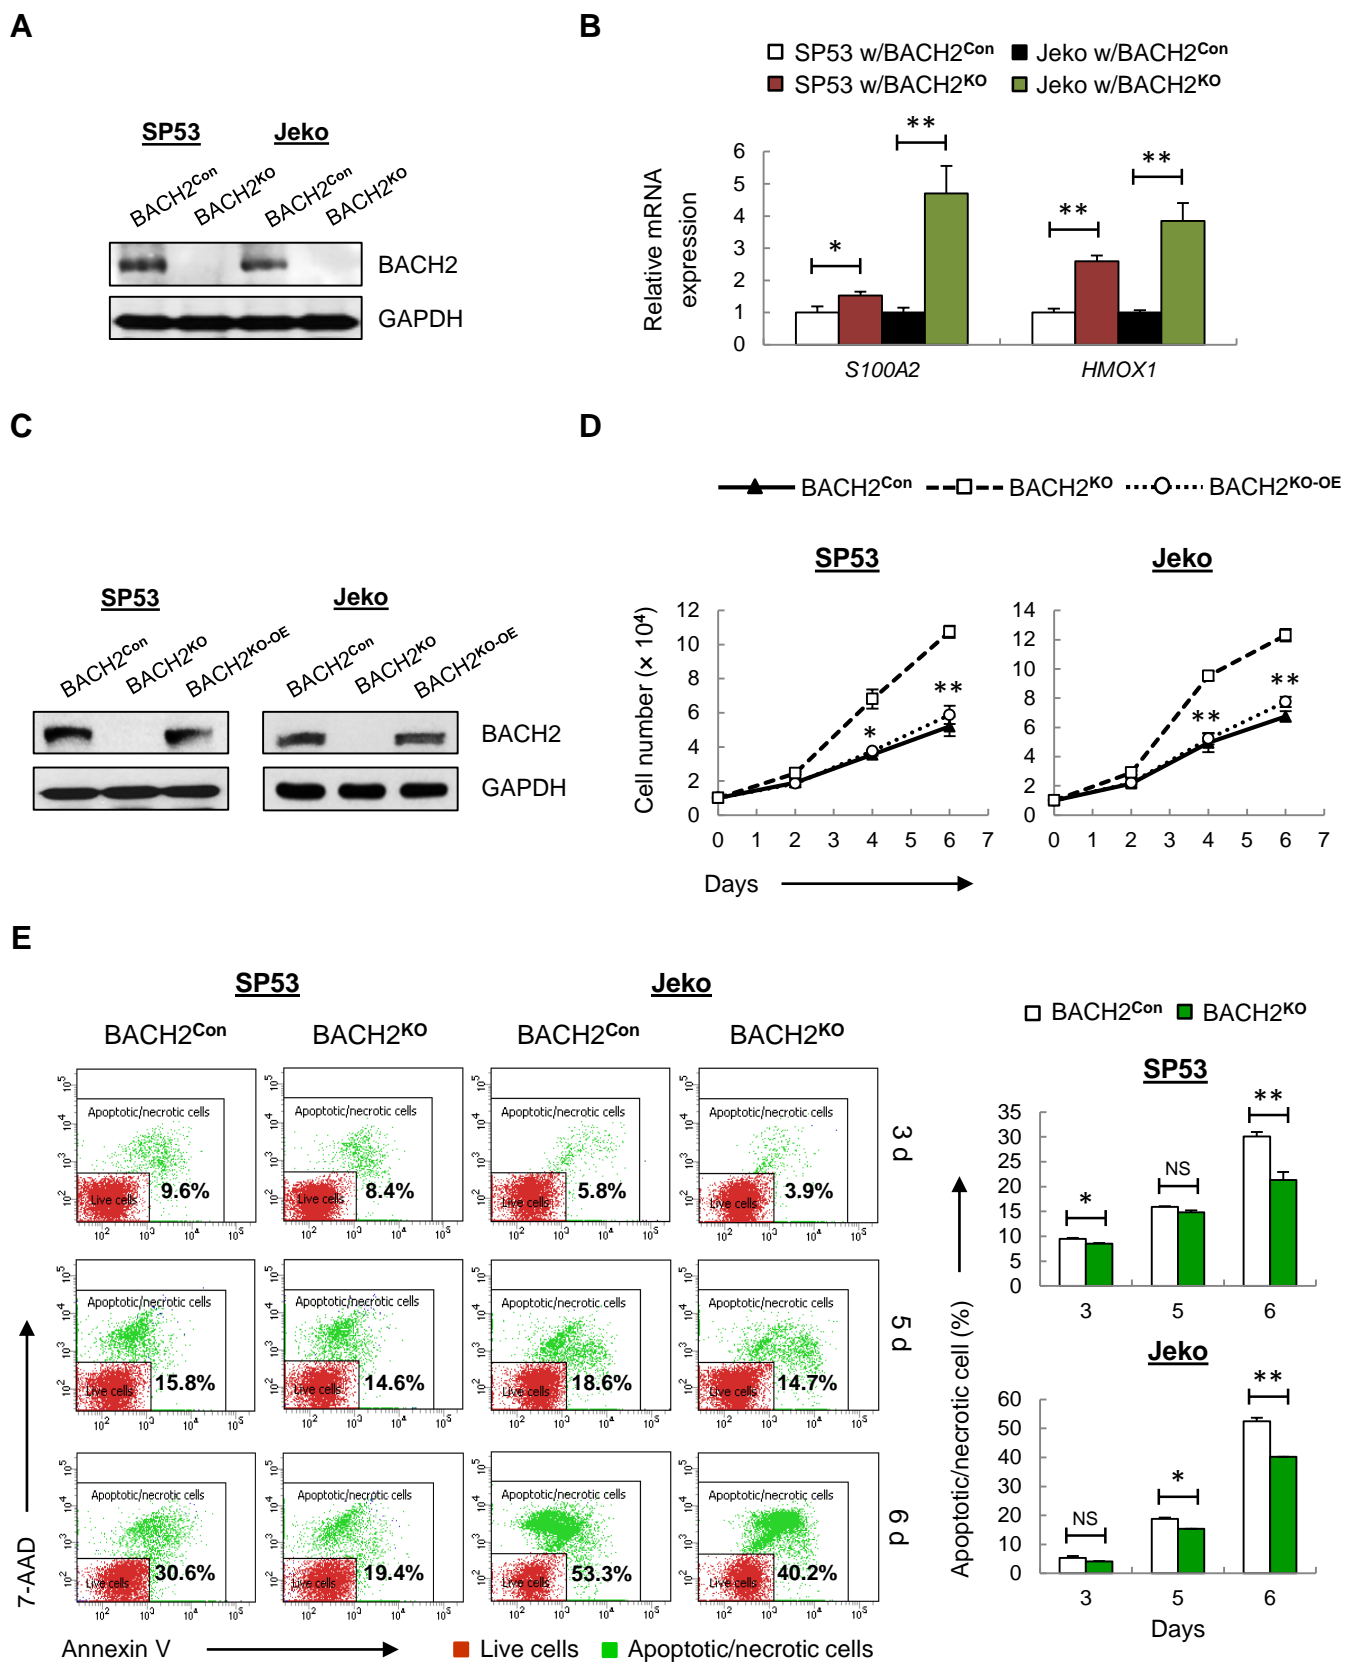



F

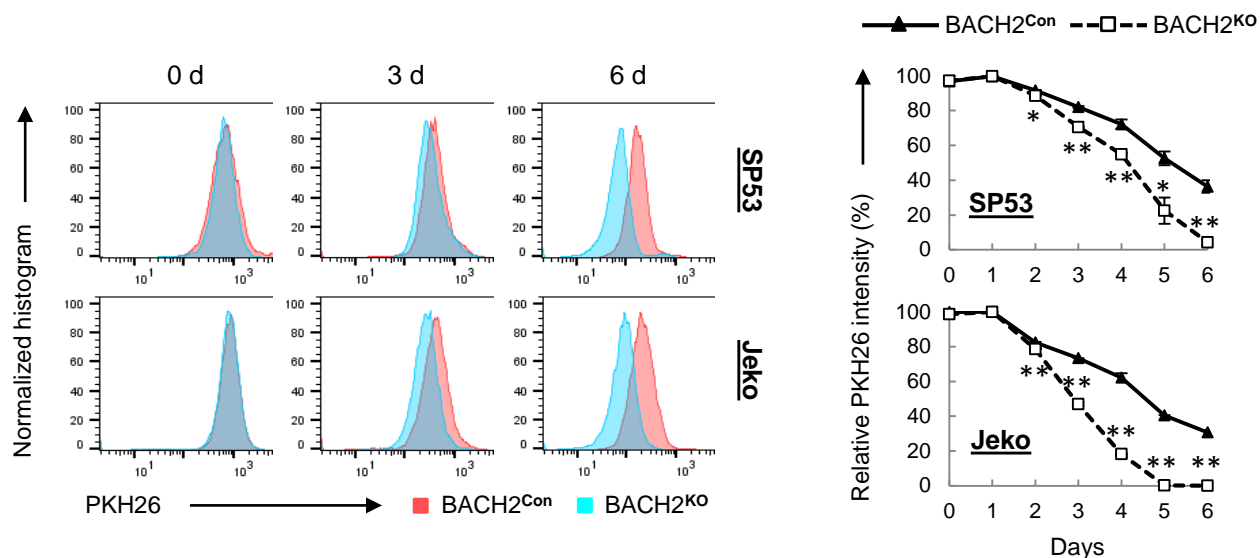

### Supplemental Figure 1

**(A)** The knockout efficiency of BACH2 in MCL cells using immunoblots with GAPDH as a loading control. The control cells were mock-transfected cells (BACH2<sup>Con</sup>). **(B)** *S100A2* and *HMOX1* mRNA levels were measured using qRT-PCR in MCL cells with BACH2<sup>KO</sup> or BACH2<sup>Con</sup>. Each value in qRT-PCR was normalized to *GAPDH* and represents the mean  $\pm$  S.D. from three independent experiments. \* $p < 0.05$ ; \*\* $p < 0.01$  (vs. control cells; Student's *t*-test). **(C)** Validation of re-introduction of BACH2 in BACH2<sup>KO</sup> MCL cells using immunoblotting. **(D)** Cell growth in each cell line was detected using Trypan Blue staining. \* $p < 0.05$ ; \*\* $p < 0.01$  (vs. BACH2<sup>KO</sup> cells; Student's *t*-test). **(E)** BACH2<sup>KO</sup> or control MCL cells were allowed to cycle for 6 days. During this time-course, cell survival was monitored by staining cells with Annexin V/7-AAD at days 3, 5 and 6. Representative FACS analyses are shown (*Left*). The % population of apoptotic/necrotic cells in each group is shown as the mean  $\pm$  S.D. (*Right*). **(F)** BACH2<sup>KO</sup> or control MCL cells were stained with PKH26 fluorescent dye, which was analyzed every day using FACS. Representative FACS analyses at days 0, 3 and 6 are shown (*Left*). The relative PKH26 intensity in each group is shown (*Right*). NS, not significant; \* $p < 0.05$ ; \*\* $p < 0.01$  (vs. control cells; Student's *t*-test).

## Supplemental Figure 2

A

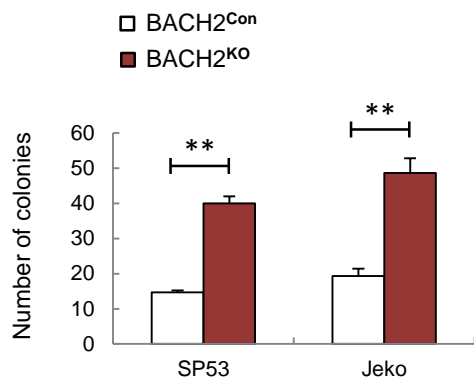

B

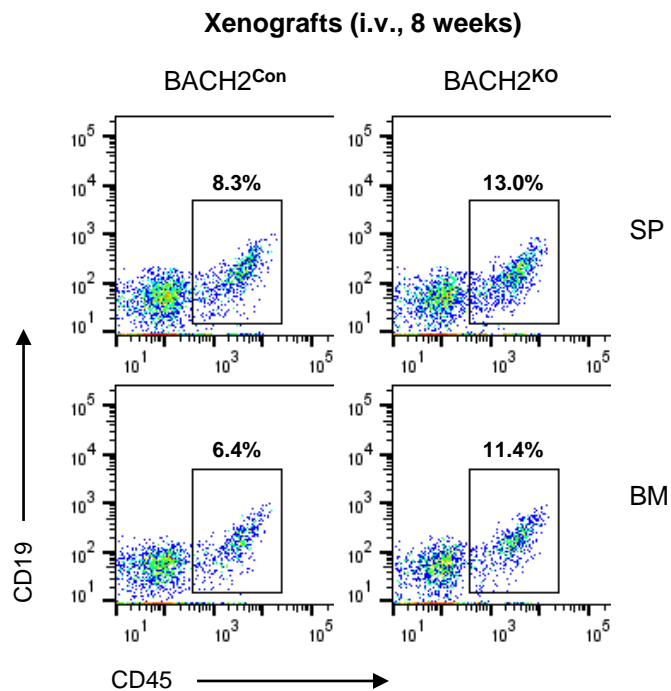

C

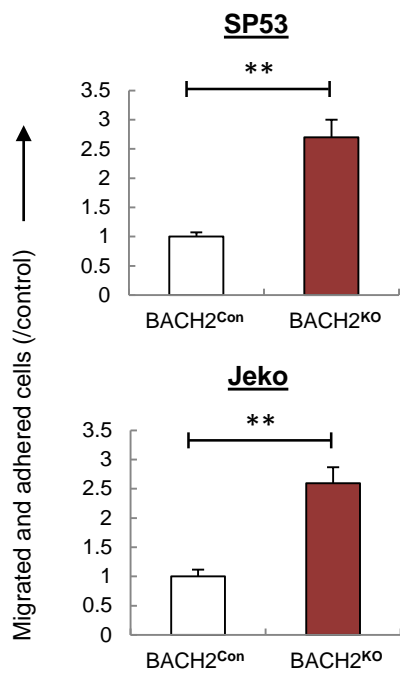

D

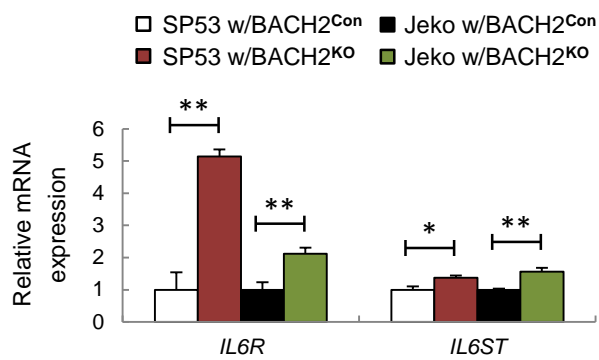

**Supplemental Figure 2**

**(A)** The average number of colonies from three parallel assays in each group is shown in the diagram. **(B)** Representative FACS analyses of SP and BM cells from xenograft mice injected with BACH2<sup>con</sup> or BACH2<sup>ko</sup> SP53 MCL cells (i.v.,  $3 \times 10^6$ /mouse) after 8 weeks. Black boxes represent CD45<sup>+</sup> human leukocyte cells. **(C)** PKH26 dye intensity in BACH2<sup>ko</sup> cells were normalized to the control. The results are shown as the mean  $\pm$  S.D. **(D)** The mRNA levels of *IL6R* and *IL6ST* in BACH2<sup>ko</sup> or BACH2<sup>con</sup> MCL cells upon serum starvation for 48 h. Each value in qRT-PCR was normalized to *GAPDH* and represents the mean  $\pm$  S.D. \* $p < 0.05$ ; \*\* $p < 0.01$  ( vs. control cells; Student's *t*-test).

## Supplemental Figure 3

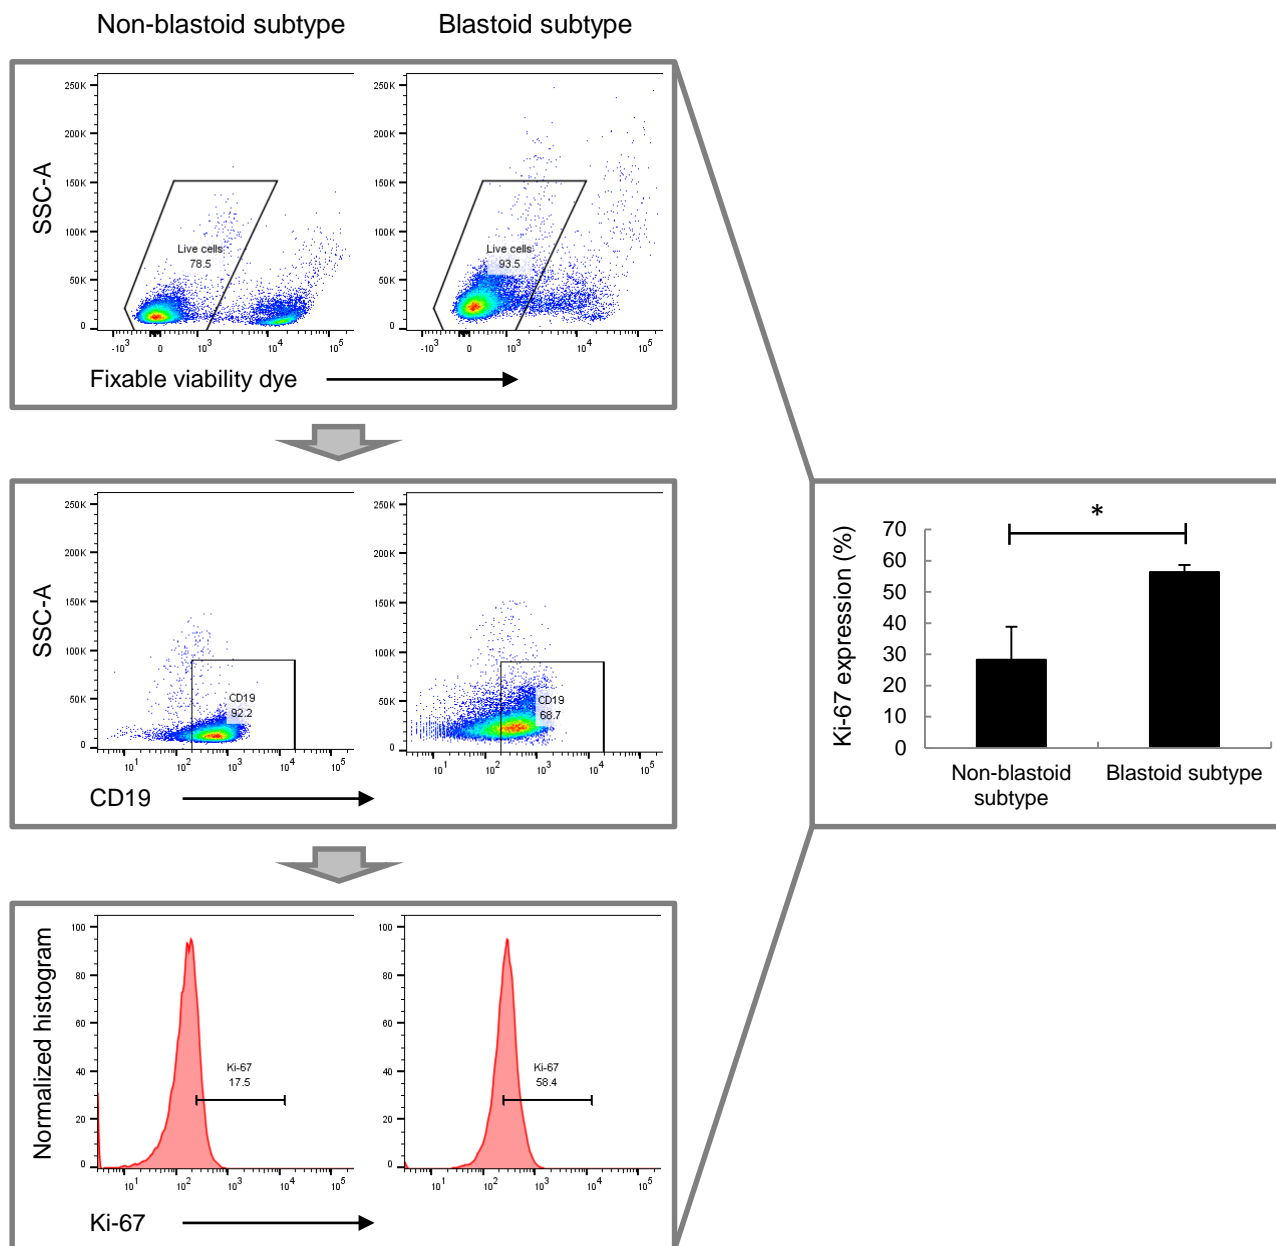

## Supplemental Figure 3

Ki-67 expression levels were measured using FACS in MCL patients (n=6, 3 for blastoid and 3 for non-blastoid subtypes). Levels were analyzed in live CD19<sup>+</sup> B cells. Representative FACS analyses of Ki-67 levels from 2 MCL patients are shown (*Left*). The % population of Ki-67<sup>+</sup> cells in 6 MCL patients are shown as the mean  $\pm$  S.D. (*Right*). \*p < 0.05 (vs. non-blastoid subtypes; Student's t-test).

## Supplemental Figure 4

A

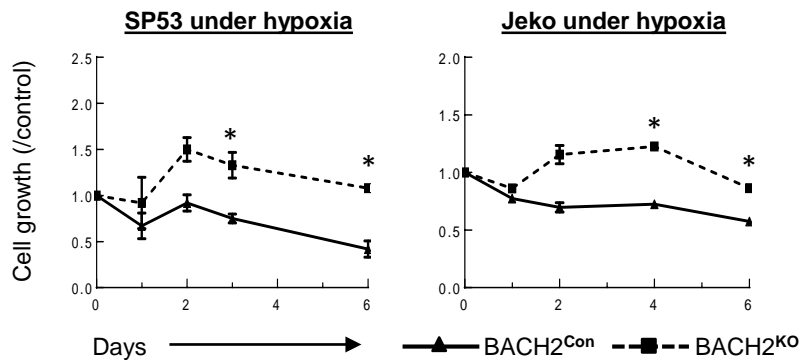

B

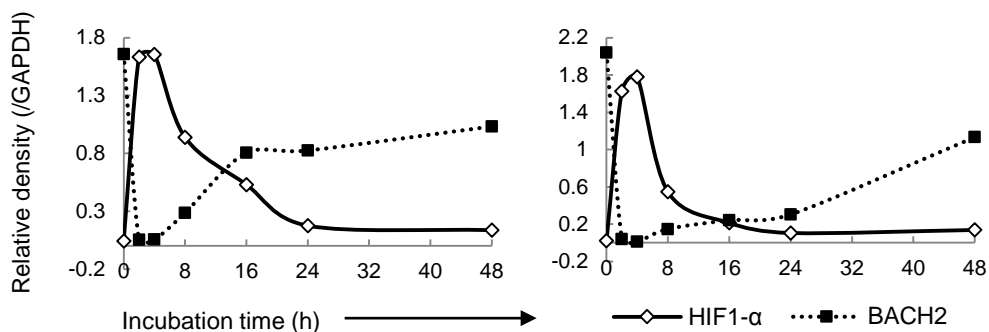

## Supplemental Figure 4

(A) Cell growth of BACH2<sup>KO</sup> or BACH2<sup>Con</sup> MCL cells under hypoxia (at 1% O<sub>2</sub>) was determined by cell counting using Trypan Blue staining. The data represent the mean  $\pm$  S.D. from three independent experiments. \* $p < 0.05$  (vs. control cells; Student's t-test). (B) Trend charts generated with relative HIF-1 $\alpha$  and BACH2 expression levels based on densitometry analyses of immunoblots in Figure 4C are as indicated against incubation time.

## Supplemental Figure 5

A

```

ACGTGTAATAATATGGAATACTGCCTGTACACAAGAGGGCCAAGTTATAG -950
GTGTTTtagggAAACGTGGCAGAATTTTCTGGCCTTGGCAAGAGGTAAAGT -900
TGCAGGCACCAGCACAACTAACAACCTTATTTTATTGCAAATGTAC -850
ATTCAGCCTAAATCCTAATTACCTTCTGTAAAATCCTAACCACCACCAAG -800
CTTTCTTCTGACAGGGCACTCACACGACGGCCTTTAAGGGCAGCAACAAC -750
ATCCTAAGAGCCGCAGAAAGGAAAGGCAGGGGAGAGTGGCTGGAAGGCAG -700
TAGGAGCTGGGGCTGAAGCCCGGGAGGTTGGCTTTTAATGTCCTCCTGAA -650
ATTGACCACTCTCTTTCCAAAAACTGGCTTGGGGGCTTAAAGGTTTCG -600
TCAGTAGGGCAGGCGGAGGGCCTCCTGAAAAGGATTGAGAAGTCAACATT -550
CAAAGGCTGCTTTTACTCGCCCGGTCCCCACCCAAAAGGGAGTCCGGTC -500
AGCTTTGTGGGGGCCAGTGGAGCATCTTTTCTTGCCCTTCCGGGAAAACG -450
CTAGCTAACCCTGGGATCCCCGGTCCCGACGTCTGCTCTCCTTCCCAGG -400
TGCAGCACCTAGGGCTCTGGCCCCCTCCCCACGTGCCACACCAGCCCTCA -350
CCACTACTCTCACCTGCTATGCCCCCAACCCTCGTCTTTCGTGGCCGGG -300
AAGGCCAGGCCGAGCGGGGCGGTCAGCCGGGCCGGGAGGAGGGGGCTCTC -250
CGGGCCGCGCGGCCGCACAAAGCGGGGAGATCTGCTGCTGCGGCGGCATG -200
AGGCGCGCCCCCTCCGCGAGCCAGCGGAGCGCGCGCGCCGCCCCCGTC -150
CCCCGCCCCCGCCCCAGCCCCGGAGCGCCATTTCGCGGAGCGGCTTACG -100
CTAGTCGCCGGGCGTACCGCGCCCCAGCGGCCGGGGAGGTGCGCTGCCCG -50
GCTCCCGTAAAGTTATTGTGAATGGGGAGCGGGTGACGTCAGCGCCGAAT 0
GTCAACAATGTAGCGATTGAGAGTGTGGGCGTTCCGGGGAGAGCGCAAGC +50
CGCGCGGCGCGGAGCAAACAGCGCCGAGCCGCGCCGCGCCTCAGCAGCAGC +100
AGCAGCAGCAGCAGCGGCAGCAGCGGCCGTGCACGCCGGGCTGCGGTGCG +150
CACAGCGCTAACGTGAGCGGCCGCGCCCTCGCCACCCCGCCTGCCCACT +200

```

HRE binding site: [NCGTG](#)

B

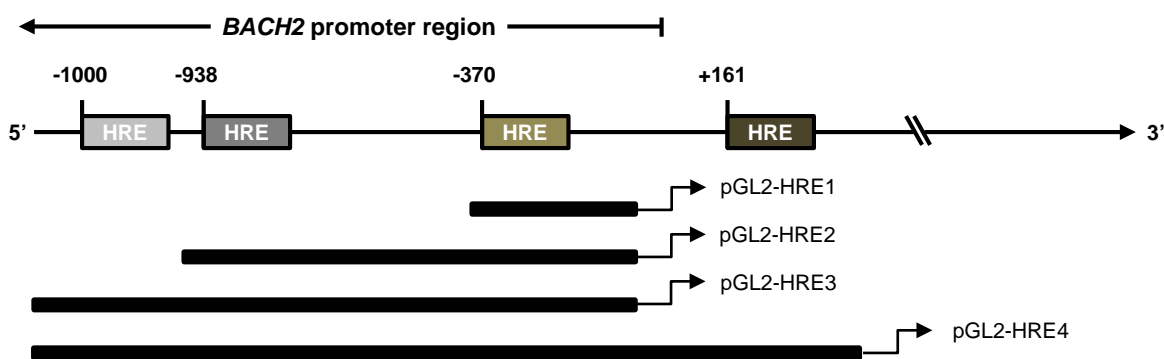

C

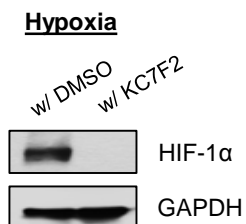

D

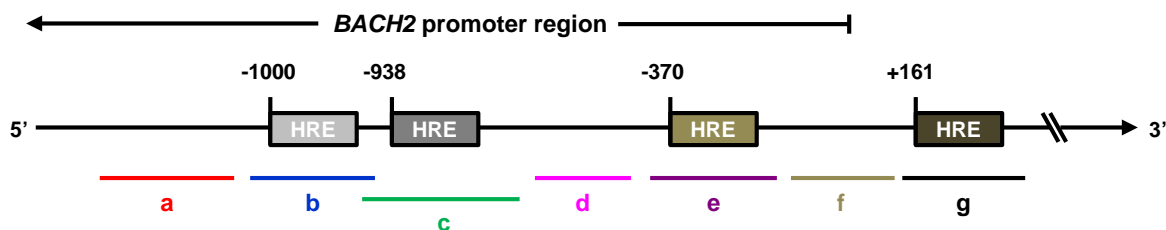

E

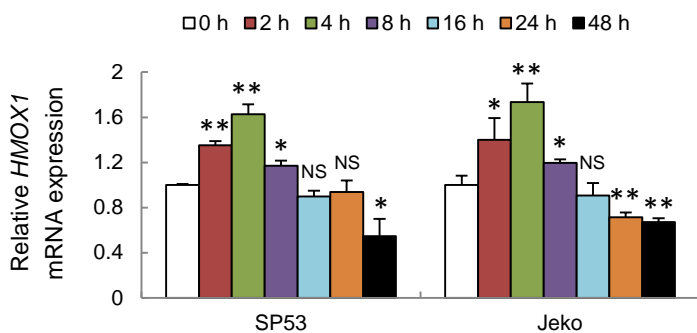

### Supplemental Figure 5

**(A)** The proximal promoter and 5' UTR region (-1000bp/+200bp) of human *BACH2* gene. Blue, putative hypoxia-responsive elements (HRE, NCGTGT). **(B)** Four putative HREs binding sites within *BACH2* promoter and 5'UTR regions along with serial deletion of promoter constructs are indicated. **(C)** Immunoblots of HIF-1 $\alpha$  in 293T cells upon KC7F2 treatment (40  $\mu$ mol/L) at 1% O<sub>2</sub> for 4 h. GAPDH was used as a loading control. **(D)** The schematic of the DNA fragments (a-g) on the *BACH2* promoter. Among them, fragments b, c, e and g contain HIF-1 $\alpha$  binding sites (HRE). **(E)** *HMOX1* mRNA levels were measured by qRT-PCR using MCL cells cultured under hypoxia at the indicated time. The values compared to the controls (at 0 h) are indicated as the mean  $\pm$  S.D.. NS, not significant; \* $p$  < 0.05; \*\* $p$  < 0.01 (vs. control cells; Student's *t*-test).

## Supplemental Figure 6

A

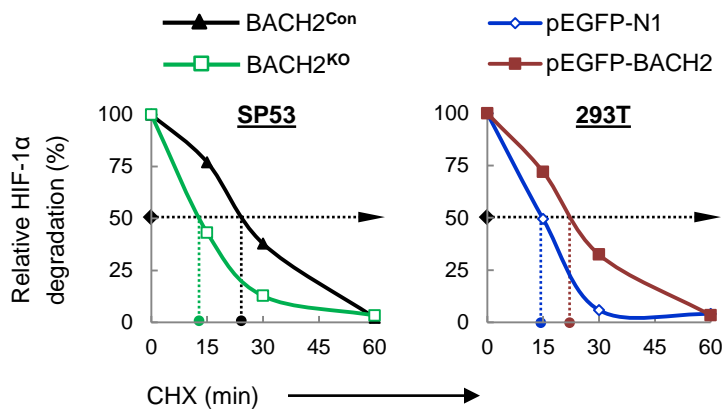

B

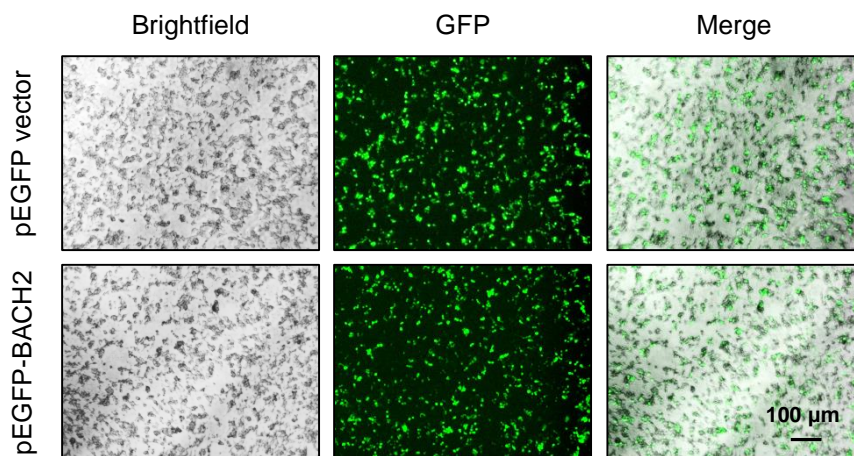

C

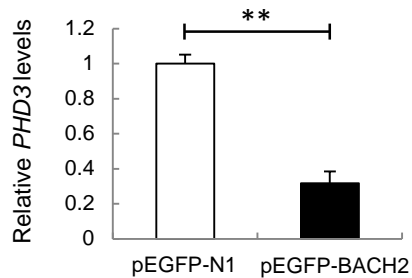

D

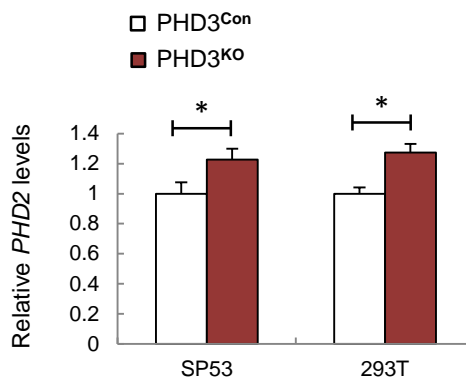



**Supplemental Figure 6**

**(A)** The relative half-life ( $t_{1/2}$ ) of HIF-1 $\alpha$  (50% of degradation, black arrow) as shown in Figure 6B and 6D is indicated in the diagram. Green dotted line and black dotted line represent  $t_{1/2}$  of HIF-1 $\alpha$  in BACH2<sup>KO</sup> and control SP53 MCL cells, respectively. Red dotted line and blue dotted line represent  $t_{1/2}$  of HIF-1 $\alpha$  in 293T cells transfected with pEGFP-BACH2 and pEGFP-N1, respectively. **(B)** 293T cells were transiently transfected with HIF-1 $\alpha$  and BACH2 expression plasmids for 48 h. The pEGFP-N1 empty vector was used as a control. Transfection efficiency was confirmed after 48 h, and GFP<sup>+</sup> cells were imaged under microscope. Scale bar, 100  $\mu$ m. **(C)** The *PHD3* mRNA levels were measured in 293T cells transiently transfected with the pEGFP-BACH2 plasmids for 48 h, with pEGFP-N1 empty vector as a control. Each value in qRT-PCR was normalized to *GAPDH* and represents the mean  $\pm$  S.D. **(D)** *PHD2* mRNA levels were measured using qRT-PCR in PHD3<sup>KO</sup> or PHD3<sup>Con</sup> cells. Each qRT-PCR value was normalized to *GAPDH* and is presented as the mean  $\pm$  S.D. \*p < 0.05; \*\*p < 0.01 (vs. control cells; Student's *t*-test).

## Supplemental Figure 7

A

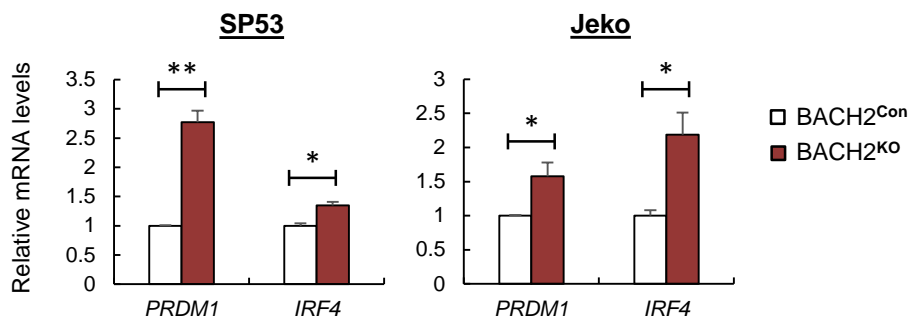

B

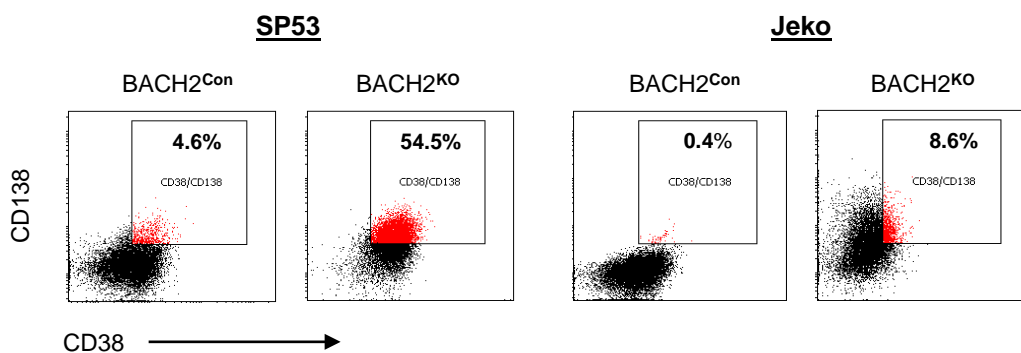

C

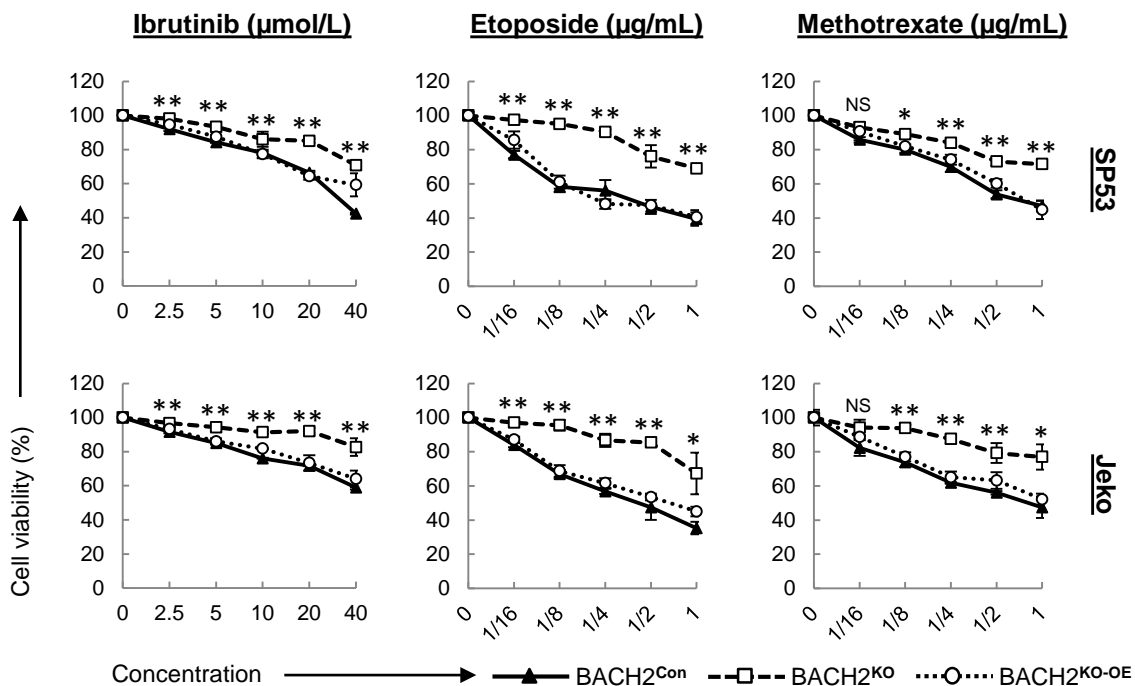

**Supplemental Figure 7**

**(A)** The mRNA levels of *PRDM1* and *IRF4* were determined using qRT-PCR. Each value was normalized to *GAPDH* and represents the mean  $\pm$  S.D. **(B)** CD38 and CD138 levels in BACH2<sup>KO</sup> or BACH2<sup>Con</sup> MCL cells were measured using FACS analysis, and the % population of double-positive cells (CD38<sup>+</sup>/CD138<sup>+</sup>) are indicated. **(C)** BACH2<sup>KO</sup>, BACH2<sup>KO-OE</sup> or mock-transfected control MCL cells (SP53 and Jeko) were treated with ibrutinib, etoposide, and methotrexate for 24 h. Cell viability was determined using MTT assays. The data represent the mean  $\pm$  S.D. NS, not significant; \* $p < 0.05$ ; \*\* $p < 0.01$  (BACH2<sup>KO</sup> vs. control cells; Student's *t*-test).

Supplemental Table 1

|              | Patient # | Sex | Age (yr) | Extranodal involvement | Morphologic variant <sup>a</sup> | Treatment status <sup>b</sup> | Tissue collection <sup>c</sup> |
|--------------|-----------|-----|----------|------------------------|----------------------------------|-------------------------------|--------------------------------|
| mRNA levels  | MCL1      | M   | 64       | Bone marrow, other     | Blastoid                         | Untreated                     | PB                             |
|              | MCL2      | F   | 64       | Bone marrow            | Unk                              | Treated                       | PB                             |
|              | MCL3      | M   | 70       | Bone marrow            | Blastoid                         | Untreated                     | PB                             |
|              | MCL4      | F   | 66       | Bone marrow            | Blastoid                         | Untreated                     | PB                             |
|              | MCL5      | M   | 61       | Bone marrow, other     | Blastoid                         | Treated                       | PB                             |
|              | MCL6      | F   | 83       | Bone marrow, other     | Blastoid                         | Treated                       | PB                             |
|              | MCL7      | M   | 68       | Bone marrow, other     | Blastoid                         | Treated                       | PB                             |
|              | MCL8      | M   | 63       | Bone marrow            | Blastoid                         | Treated                       | PB                             |
|              | MCL9      | M   | 62       | Bone marrow            | Blastoid                         | Untreated                     | PB                             |
|              | MCL10     | M   | 64       | Bone marrow            | Unk                              | Treated                       | PB                             |
|              | MCL11     | M   | 53       | Bone marrow, other     | Blastoid                         | Treated                       | PB                             |
|              | MCL12     | Unk | Unk      | Bone marrow, other     | Blastoid                         | Treated                       | PB                             |
|              | MCL13     | M   | 51       | Bone marrow            | Classical                        | Treated                       | PB                             |
|              | MCL14     | M   | 80       | Bone marrow            | Classical                        | Treated                       | PB                             |
|              | MCL15     | M   | 62       | Bone marrow            | Classical                        | Untreated                     | PB                             |
|              | MCL16     | F   | 70       | Bone marrow            | Classical                        | Untreated                     | PB                             |
|              | MCL17     | M   | 58       | Bone marrow            | Classical                        | Untreated                     | PB                             |
|              | MCL18     | M   | 78       | Bone marrow            | Classical                        | Treated                       | PB                             |
|              | MCL19     | M   | 65       | Bone marrow            | Classical                        | Treated                       | PB                             |
|              | MCL20     | M   | 53       | Bone marrow, other     | Classical                        | Treated                       | PB                             |
|              | MCL21     | M   | 35       | Bone marrow, other     | Classical                        | Treated                       | PB                             |
|              | MCL22     | M   | 53       | Unk                    | Classical                        | Treated                       | PB                             |
|              | MCL23     | Unk | Unk      | Unk                    | Unk                              | Unk.                          | PB                             |
|              | MCL24     | Unk | Unk      | Unk                    | Unk                              | Unk.                          | PB                             |
|              | MCL25     | M   | 75       | Unk                    | Unk                              | Treated                       | PB                             |
|              | MCL26     | Unk | Unk      | Unk                    | Unk                              | Unk.                          | PB                             |
|              | MCL27     | Unk | Unk      | Unk                    | Unk                              | Unk.                          | PB                             |
|              | MCL28     | M   | 78       | Bone marrow            | Classical                        | Treated                       | BM                             |
|              | MCL29     | M   | 66       | Bone marrow, other     | Classical                        | Treated                       | BM                             |
|              | MCL30     | F   | 58       | Bone marrow            | Classical                        | Treated                       | BM                             |
|              | MCL31     | M   | 56       | Bone marrow            | Classical                        | Untreated                     | BM                             |
|              | MCL32     | M   | 64       | Unk                    | Classical                        | Treated                       | BM                             |
|              | MCL33     | M   | 63       | Unk                    | Classical                        | Treated                       | BM                             |
|              | MCL34     | M   | 64       | Bone marrow, other     | Unk                              | Treated                       | BM                             |
|              | MCL35     | M   | 66       | Bone marrow, other     | Classical                        | Treated                       | BM                             |
| Heme content | 1         | M   | 53       | Unk                    | Classical                        | Treated                       | PB                             |
|              | 2         | Unk | Unk      | Bone marrow, other     | Blastoid                         | Treated                       | PB                             |
|              | 3         | Unk | Unk      | Unk                    | Unk                              | Unk                           | SP                             |
|              | 4         | Unk | Unk      | Unk                    | Unk                              | Unk                           | SP                             |
|              | 5         | M   | 56       | Bone marrow            | Classical                        | Untreated                     | BM                             |
|              | 6         | M   | 66       | Bone marrow, other     | Classical                        | Treated                       | BM                             |

<sup>a</sup> Lymphoma staging verified by MD Anderson pathologist.

<sup>b</sup> Treatment status of patients upon sample collection.

<sup>c</sup> Cells were isolated from either fresh or previously frozen peripheral blood, bone marrow, or spleen.

Unk, unknown status; PB, peripheral blood; BM, bone marrow; SP, spleen; M, male; F, female; yr, year.

**Supplemental Table 1**

MCL patient samples (n=35) were evaluated for *BACH2* mRNA levels. Total of 27 PB and 8 BM samples were used. Additional 6 MCL patient samples (n=6, 2 from PB, 2 from BM and 2 from SP) were evaluated for cellular heme content. All data were recorded and collected at MD Anderson Cancer Center.

Supplemental Table 2

|                | Mice | Sex | Age (w) | # of cells injected | Injected region | Time period (w) | Tissue examined |
|----------------|------|-----|---------|---------------------|-----------------|-----------------|-----------------|
| s.c. injection | #1   | F   | 7       | $3.5 \times 10^6$   | Neck            | 4               | SP / BM         |
|                | #2   | M   | 6       | $3.5 \times 10^6$   | Neck            | 4               | SP / BM         |
|                | #3   | F   | 7       | $3.5 \times 10^6$   | Neck            | 4               | SP / BM         |
|                | #4   | M   | 6       | $3.5 \times 10^6$   | Neck            | 4               | SP / BM         |
|                | #5   | F   | 7       | $3.5 \times 10^6$   | Neck            | 4               | SP / BM         |
|                | #6   | M   | 6       | $3.5 \times 10^6$   | Neck            | 4               | SP / BM         |
|                | #7   | F   | 7       | $3.5 \times 10^6$   | Neck            | 4               | SP / BM         |
|                | #8   | M   | 6       | $3.5 \times 10^6$   | Neck            | 4               | SP / BM         |
|                | #9   | F   | 6       | $3.5 \times 10^6$   | Neck            | 4               | SP / BM         |
|                | #10  | M   | 6       | $3.5 \times 10^6$   | Neck            | 4               | SP / BM         |
| i.v. injection | #11  | M   | 7       | $3 \times 10^6$     | Tail vein       | 8               | SP / BM         |
|                | #12  | M   | 7       | $3 \times 10^6$     | Tail vein       | 8               | SP / BM         |
|                | #13  | F   | 7       | $3 \times 10^6$     | Tail vein       | 8               | SP / BM         |
|                | #14  | F   | 6       | $3 \times 10^6$     | Tail vein       | 8               | SP / BM         |
|                | #15  | M   | 7       | $3 \times 10^6$     | Tail vein       | 8               | SP / BM         |
|                | #16  | M   | 7       | $3 \times 10^6$     | Tail vein       | 8               | SP / BM         |
|                | #17  | F   | 7       | $3 \times 10^6$     | Tail vein       | 8               | SP / BM         |
|                | #18  | F   | 6       | $3 \times 10^6$     | Tail vein       | 8               | SP / BM         |

BM, bone marrow; SP, spleen; s.c., subcutaneous; i.v., intravenous; M, male; F, female; w, week.

Supplemental Table 3

| Fragments           | ChIP-qRT-PCR primers    |                        |
|---------------------|-------------------------|------------------------|
|                     | Forward primer (5'-3')  | Reverse primer (5'-3') |
| <b>BACH2-ChIP-a</b> | GGACCTCAGAAGCAGGGTGT    | AACAGCACTGCAGAGTCCCTG  |
| <b>BACH2-ChIP-b</b> | GGACGCTTCACTGCTTCCTCA   | GGCCCTCTTGTGTACAGGCAG  |
| <b>BACH2-ChIP-c</b> | CTGCCTGTACACAAGAGGGCC   | GCCCTGTCAGAAGAAAGCTTGG |
| <b>BACH2-ChIP-d</b> | GGGGCTTAAAGGTTTCGCTCAGT | AAGCTGACCGGACTCCCTTT   |
| <b>BACH2-ChIP-e</b> | AACGCTAGCTAACCCCTGGGATC | CTTCCCGGCCACGAAAGA     |
| <b>BACH2-ChIP-f</b> | CCGGCTCCCGTAAAGTTATTGTG | GCTCGGCGCTGTTTGCT      |
| <b>BACH2-ChIP-g</b> | GCACAGCGCTAACGTGAGC     | CATCACATGGCAGCTCGTTCC  |
